# Supplementary material for: MELK is an oncogenic kinase essential for mitotic progression in basal-like breast cancer cells
Source: eLife journal article supplement (doi:10.7554/elife.01763), 2014-05-20
Supplement: supp [file elife-01763-supp-v1.zip]

**Figure 1-figure supplement 2**

| Gene    | Description                                                       |
|---------|-------------------------------------------------------------------|
| ADCK2   | aarF domain containing kinase 2                                   |
| CDK9    | cyclin-dependent kinase 9                                         |
| CHEK2   | checkpoint kinase 2                                               |
| CNKSR1  | connector enhancer of kinase suppressor of Ras 1                  |
| CSNK1E  | casein kinase 1, epsilon                                          |
| CSNK1G2 | casein kinase 1, gamma 2                                          |
| DAK     | dihydroxyacetone kinase 2 homolog                                 |
| IKBKE   | inhibitor of nuclear factor kappa-B kinase subunit epsilon        |
| MAPK12  | mitogen-activated protein kinase 12                               |
| MAPK15  | mitogen-activated protein kinase 15                               |
| MAPK7   | mitogen-activated protein kinase 7                                |
| MAST1   | microtubule associated serine/threonine kinase 11                 |
| MELK    | maternal embryonic leucine zipper kinase                          |
| NEK6    | NIMA (never in mitosis gene a)-related kinase 6                   |
| NUAK2   | NUAK family, SNF1-like kinase, 2                                  |
| PACSIN1 | protein kinase C and casein kinase substrate in neurons protein 1 |
| PCTK1   | serine/threonine-protein kinase PCTAIRE-1                         |
| PDXK    | pyridoxal (pyridoxine, vitamin B6) kinase                         |
| PLK1    | Polo-like kinase 1                                                |
| RET     | "rearranged during transfection" proto-oncogene                   |
| RPS6KA5 | ribosomal protein S6 kinase alpha-5                               |
| SGK     | serum/glucocorticoid regulated kinase 1                           |
| TK1     | Thymidine kinase 1                                                |
| TYROBP  | TYRO protein tyrosine kinase binding protein                      |
| UCK2    | uridine-cytidine kinase 2                                         |
