# Supplementary material for: MELK is an oncogenic kinase essential for mitotic progression in basal-like breast cancer cells
Source: eLife journal article supplement (doi:10.7554/elife.01763), 2014-05-20
Supplement: supp [file elife-01763-supp-v1.zip]

Archive with 22 entries (22 files):
- elife_poa_e01763_Figure_5_figure_supplement_1.pdf
- elife_poa_e01763_Figure_1_figure_supplement_2.pdf
- elife_poa_e01763_Video_4.avi
- elife_poa_e01763_Figure_6_figure_supplement_3.pdf
- elife_poa_e01763_Figure_4_figure_supplement_2.pdf
- elife_poa_e01763_Video_2.avi
- elife_poa_e01763_Figure_3_figure_supplement_3.pdf
- elife_poa_e01763_Video_1.avi
- elife_poa_e01763_Figure_2_figure_supplement_2.pdf
- elife_poa_e01763_Figure_6_figure_supplement_1.pdf
- elife_poa_e01763_Figure_3_figure_supplement_1.pdf
- elife_poa_e01763_Figure_5_figure_supplement_2.pdf
- elife_poa_e01763_Figure_4_figure_supplement_1.pdf
- elife_poa_e01763_Figure_1_figure_supplement_1.pdf
- elife_poa_e01763_Supplementary_file_2.xls
- elife_poa_e01763_Supplementary_file_1.xls
- elife_poa_e01763_Figure_5_figure_supplement_3.pdf
- elife_poa_e01763_Video_3.avi
- elife_poa_e01763_Figure_3_figure_supplement_2.pdf
- elife_poa_e01763_Figure_2_figure_supplement_1.pdf
- elife_poa_e01763_Figure_7_figure_supplement_1.pdf
- elife_poa_e01763_Figure_6_figure_supplement_2.pdf
