# Supplementary material for: MELK is an oncogenic kinase essential for mitotic progression in basal-like breast cancer cells
Source: eLife journal article supplement (doi:10.7554/elife.01763), 2014-05-20
Supplement: supp [file elife-01763-supp-v1.zip]

**Figure 1-figure supplement 1**

| HMEC-DD cells         | # tumor / # injection |
|-----------------------|-----------------------|
| NeuT                  | 0/8                   |
| PIK3CA (H1047R)       | 0/10                  |
| NeuT, PIK3CA (H1047R) | 8/8                   |
