# Supplementary material for: MELK is an oncogenic kinase essential for mitotic progression in basal-like breast cancer cells
Source: eLife journal article supplement (doi:10.7554/elife.01763), 2014-05-20
Supplement: supp [file elife-01763-supp-v1.zip › elife_poa_e01763_Figure_4_figure_supplement_1.pdf]

**Figure 4-figure supplement 1**

| HMEC-DD-NeuT cells<br>expressing | # tumor / # injection |
|----------------------------------|-----------------------|
| Vector                           | 0/6                   |
| Myr-MELK                         | 8/8                   |
| WT-MELK                          | 8/8                   |
