# Supplementary material for: MELK is an oncogenic kinase essential for mitotic progression in basal-like breast cancer cells
Source: eLife journal article supplement (doi:10.7554/elife.01763), 2014-05-20
Supplement: supp [file elife-01763-supp-v1.zip › elife_poa_e01763_Supplementary_file_1.xls]

## Sheet: Sheet1
Supplementary file 1. Breast cancer gene expression datasets used in this study
	n	References
For comparing MELK expression in	Normal breast
	vs carcinoma
TCGA_breast	61 vs 392	Koboldt et al., (2012) Nature
Richardson_breast	7 vs 40	Richardson et al., (2006) Cancer Cell
Ma_breast	14 vs 18	Ma et al., (2009) Breast Cancer Res
For analysis of disease grade
Desmedt_breast	198	Desmedt et al., (2007) Clin Cancer Res
Schmidt_breast	200	Schmidt et al., (2008) Cancer Res
Bittner_breast	336	unpublished
Hatzis_breast	508	Hatzis et al., (2011) JAMA
Wang_breast	286	Wang et al., (2005) Lancet
Curtis_breast	1556	Curtis et a., (2012) Nature
For analysis of metastasis-free survival
Schmidt_breast	200	Schmidt et al., (2008) Cancer Res
Loi_breast	87	Loi et a., (2007) J Clin Oncol
van 't Veer_breast	117	van 't Veer et al., (2002) Nature
Wang_breast	286	Wang et al., (2005) Lancet
Hatzis_breast	508	Hatzis et al., (2011) JAMA
For analysis of overall survival
van de Vijver_breast	295	van de Vijver et al., (2002) N Engl J Med
Desmedt_breast	198	Desmedt et al., (2007) Clin Cancer Res
Esserman_breast	130	Esserman et., (2012) Breast Cancer Res Treat
Pawitan_breast	159	Pawitan et al., (2005) Breast Cancer Res
Kao_breast	327	Kao et al., (2011) BMC Cancer
For correlative analysis of gene expression
TCGA_breast	392	Koboldt et al., (2012) Nature
Bittner_breast	261	unpublished
van de Vijver_breast	295	van de Vijver et al., (2002) N Engl J Med
Hatzis_breast	508	Hatzis et al., (2011) JAMA
