# Supplementary material for: MELK is an oncogenic kinase essential for mitotic progression in basal-like breast cancer cells
Source: eLife journal article supplement (doi:10.7554/elife.01763), 2014-05-20
Supplement: supp [file elife-01763-supp-v1.zip › elife_poa_e01763_Supplementary_file_2.xls]

## Sheet: Sheet2
Supplementary file 2. Oligonucleotides used in this study d
GFP primers for constructing pLKO-TREX-GFP
Forward	5'-gatcaccggtatggtgagcaagggcgagga-3'
Reverse	5'-gatcttaattaattacttgtacagctcgtcca-3'
MELK primers for constructing pLKO-TREX-Flag-MELK
Forward	5'-gatcaccggtgccaccatggactacaaagacgatgacgacaagaaagattatgatgaacttct-3'
Reverse	5'-gatcttaattaattataccttgcagctagataggat-3'
Histon 2B primers for constructing pWzl-H2B-GFP
Forward	5'-gatcggatccgccaccatgcctgagccagccaagtc-3'
Reverse	5'-gatcctcgagcttggagctggtgtacttgg-3'
Mutagenesis primers for MELK (D150A)
Forward	5'-tatcataaattaaagctgattgcctttggtctctgtgcaaaaccc-3'
Reverse	5'-gggttttgcacagagaccaaaggcaatcagctttaatttatgata-3'
Mutagenesis primers for MELK (T167A)
Forward	5'-aggattaccatctacaggcatgctgtgggagtctg-3'
Reverse	5'-cagactcccacagcatgcctgtagatggtaatcct-3'
Mutagenesis primers for shMELK2-resistant MELK
Forward	5'-caaaagctagaaaccagtgcctgaaggagacacctattaaaataccagtaaattcaacag-3'
Reverse	5'-ctgttgaatttactggtattttaataggtgtctccttcaggcactggtttctagcttttg-3'
Oligo for constructing pLKO-tet-on-scramble
Forward	5'-ccgggtggactcttgaaagtactatctcgagatagtactttcaagagtccactttttg-3'
Reverse	5'-aattaaaaagtggactcttgaaagtactatctcgagatagtactttcaagagtccac-3'
Oligo for constructing pLKO-tet-on-shMELK1
Forward	5'-ccggggtgtgatacagcctacataactcgagttatgtaggctgtatcacacctttttg-3'
Reverse	5'-aattcaaaaaggtgtgatacagcctacataactcgagttatgtaggctgtatcacacc-3'
Oligo for constructing pLKO-tet-on-shMELK2
Forward	5'-ccgggcctgaaagaaactccaattactcgagtaattggagtttctttcaggctttttg-3'
Reverse	5'-aattcaaaaagcctgaaagaaactccaattactcgagtaattggagtttctttcaggc-3'
Oligo for constructing pLKO-tet-on-shFoxM1
Forward	5'-ccggggaccactttccctactttaactcgagttaaagtagggaaagtggtcctttttg-3'
Reverse	5'-aattcaaaaaggaccactttccctactttaactcgagttaaagtagggaaagtggtcc-3'
siFoxM1	ggaccacuuucccuacuuu (Fu et al., 2008; Wang et al., 2005)
Primers used in chromatin immunoprecipitation experiments
MELK-Fwrd	5'-aggctgaggcgggaggatcgctt-3'
MELK-rv	5'-gtgttgccacgaggaataagaacc-3'
CDC25B-Fwrd	5'-aagagcccatcagttccgcttg-3'
CDC25B-Rv	5'-aagagcccatcagttccgcttg-3'
Primers used in q-PCR experiments
MELK-Fwrd	5'-aaacccaagggtaacaagga-3'
MELK-rv	5'-acagtatgcccatgctccaa-3'
CENPA-Fwrd	5′-cttcctcccatcaacacagtcg-3′
CENPA-rv	5′-tgcttctgctgcctcttgtagg-3′
BIRC5-Fwrd	5′-tcaaggaccaccgcatctcta-3′
BIRC5-rv	5′-tgaagcagaagaaacactgggc-3′
