# Supplementary figures and images for: MELK is an oncogenic kinase essential for mitotic progression in basal-like breast cancer cells
Source: eLife journal article supplement (doi:10.7554/elife.01763), 2014-05-20

Figure 6-figure supplement 3

**A**

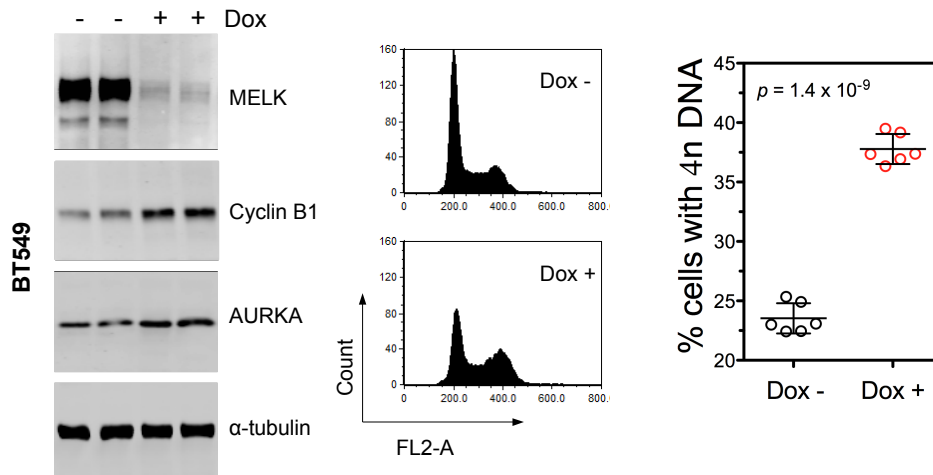

**B**

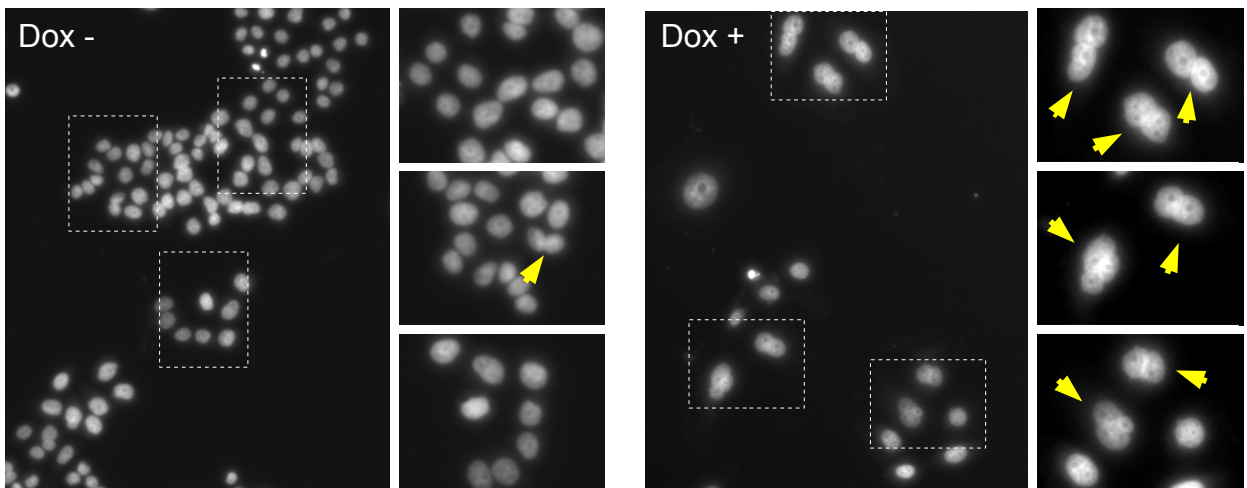

Supplement: supp [file elife-01763-supp-v1.zip]

Figure 6-figure supplement 2

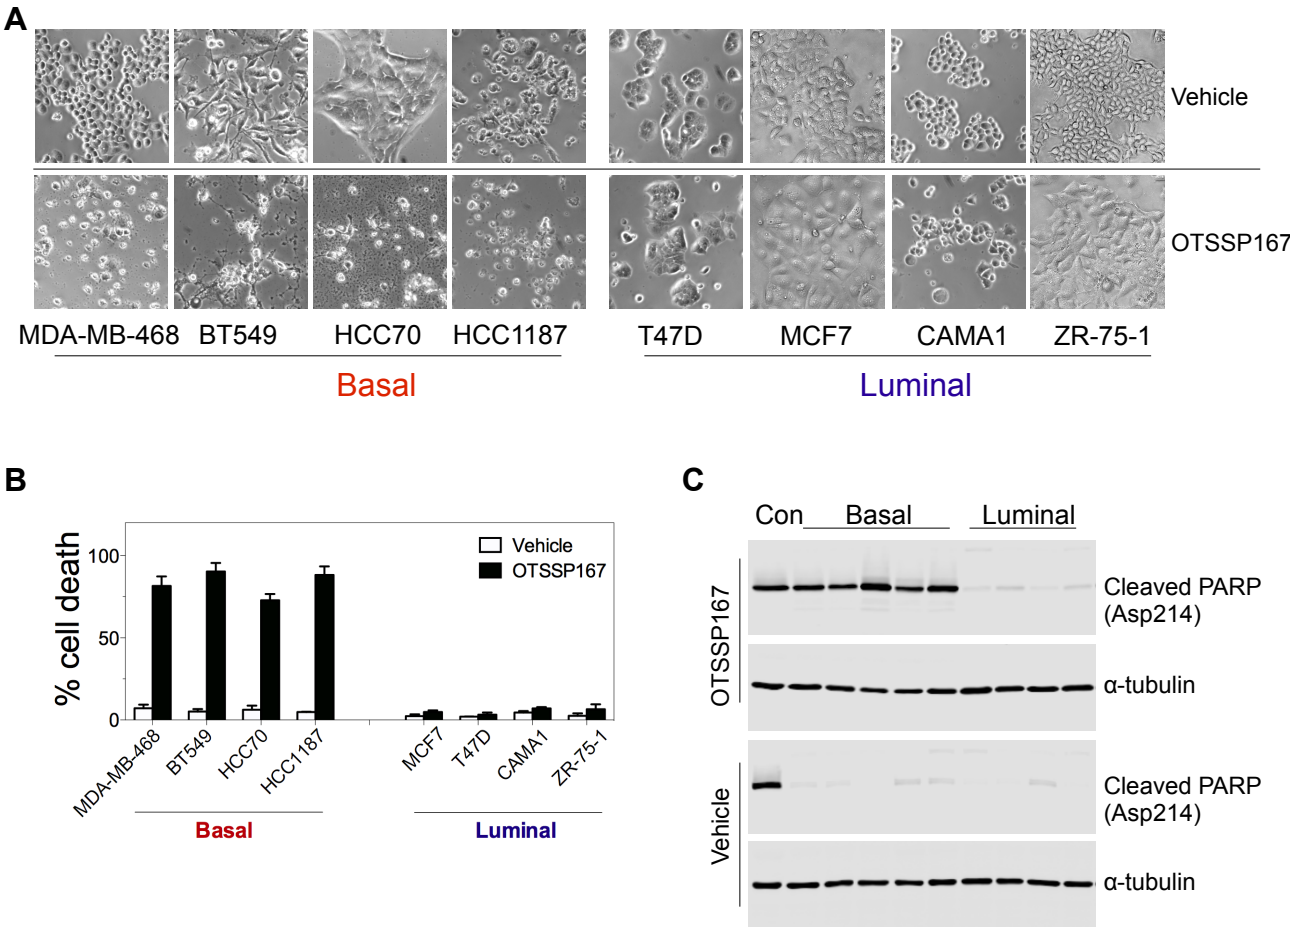

Supplement: supp [file elife-01763-supp-v1.zip]

Figure 5-figure supplement 3

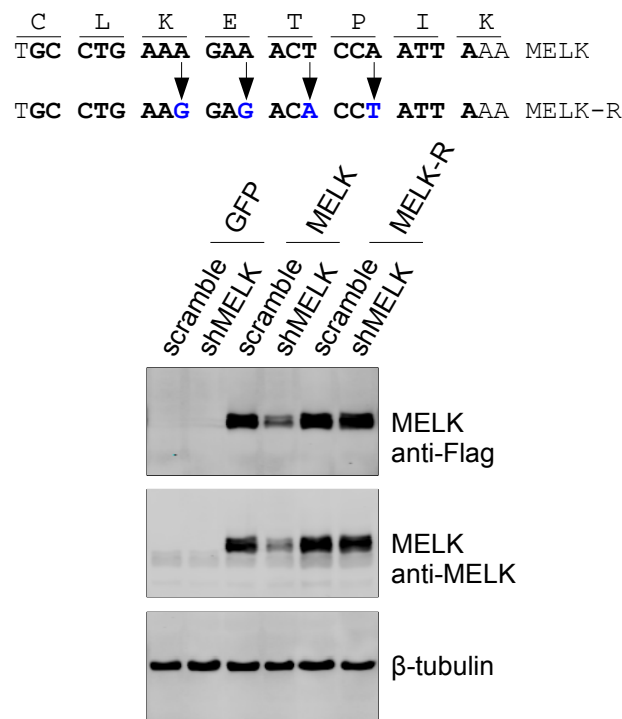

Supplement: supp [file elife-01763-supp-v1.zip]

Figure 3-figure supplement 3

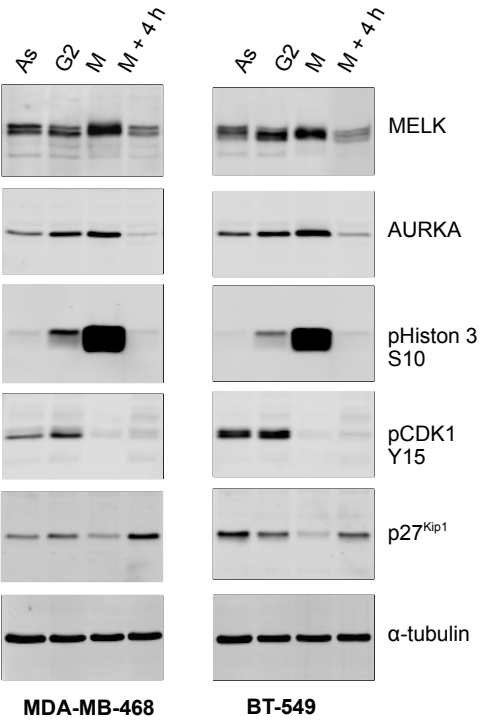

Supplement: supp [file elife-01763-supp-v1.zip]

Figure 2-figure supplement 2

**A**

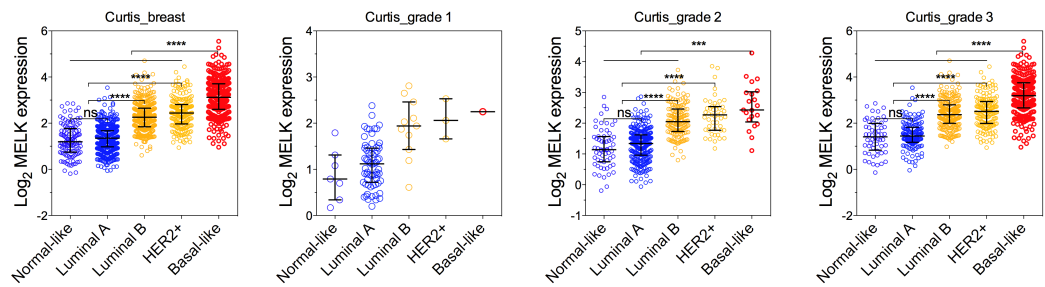

**B**

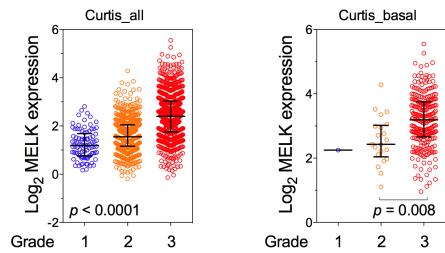

Supplement: supp [file elife-01763-supp-v1.zip]

Figure 3-figure supplement 2

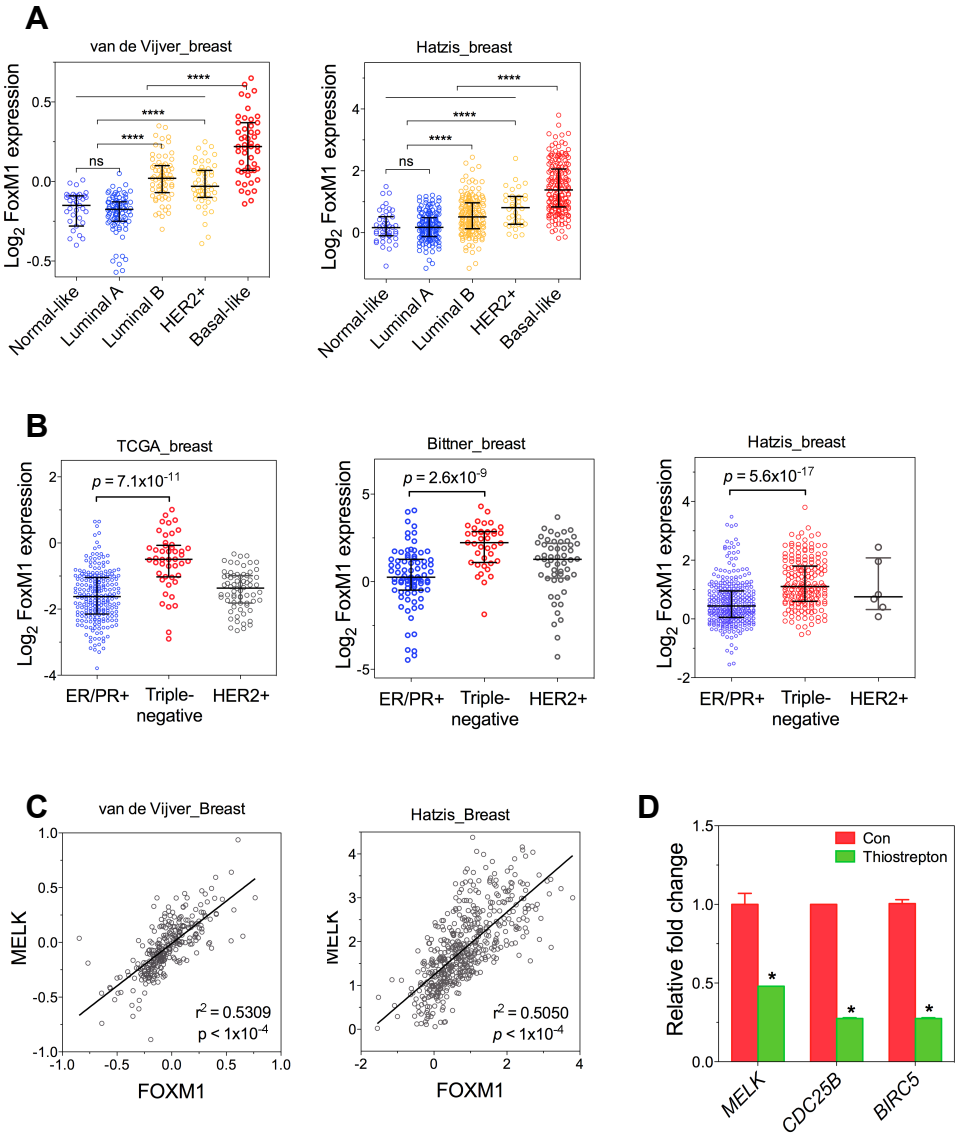

Supplement: supp [file elife-01763-supp-v1.zip]

Figure 5-figure supplement 2

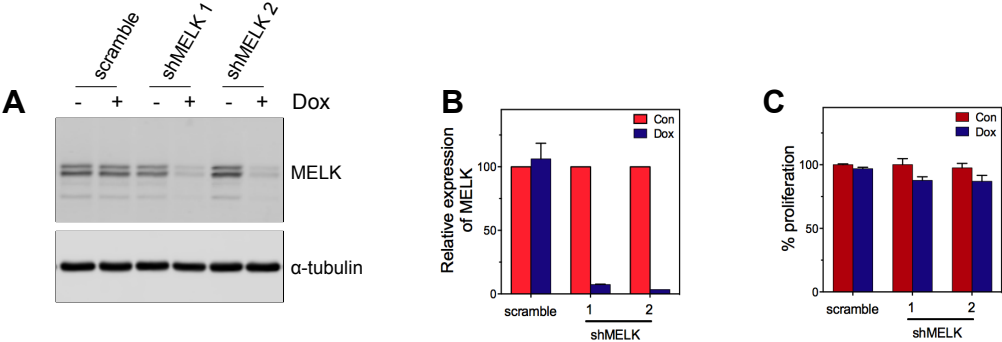

Supplement: supp [file elife-01763-supp-v1.zip]

Figure 5-figure supplement 1

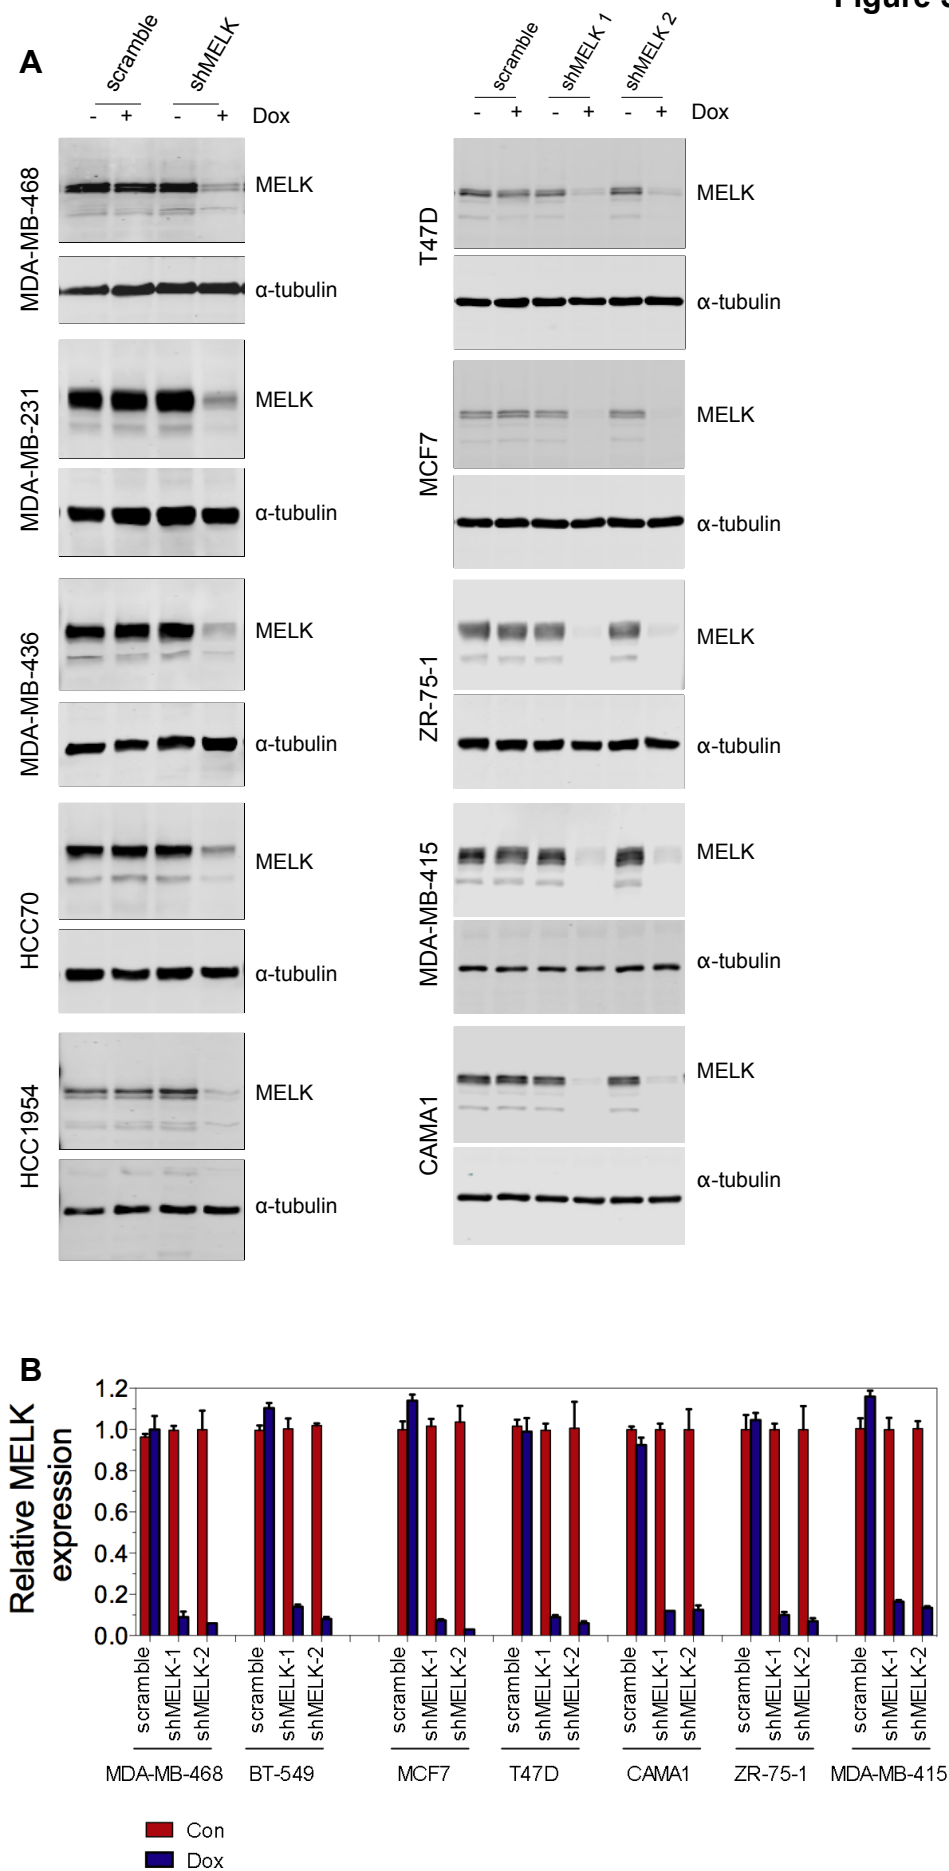

Supplement: supp [file elife-01763-supp-v1.zip]

Figure 4-figure supplement 2

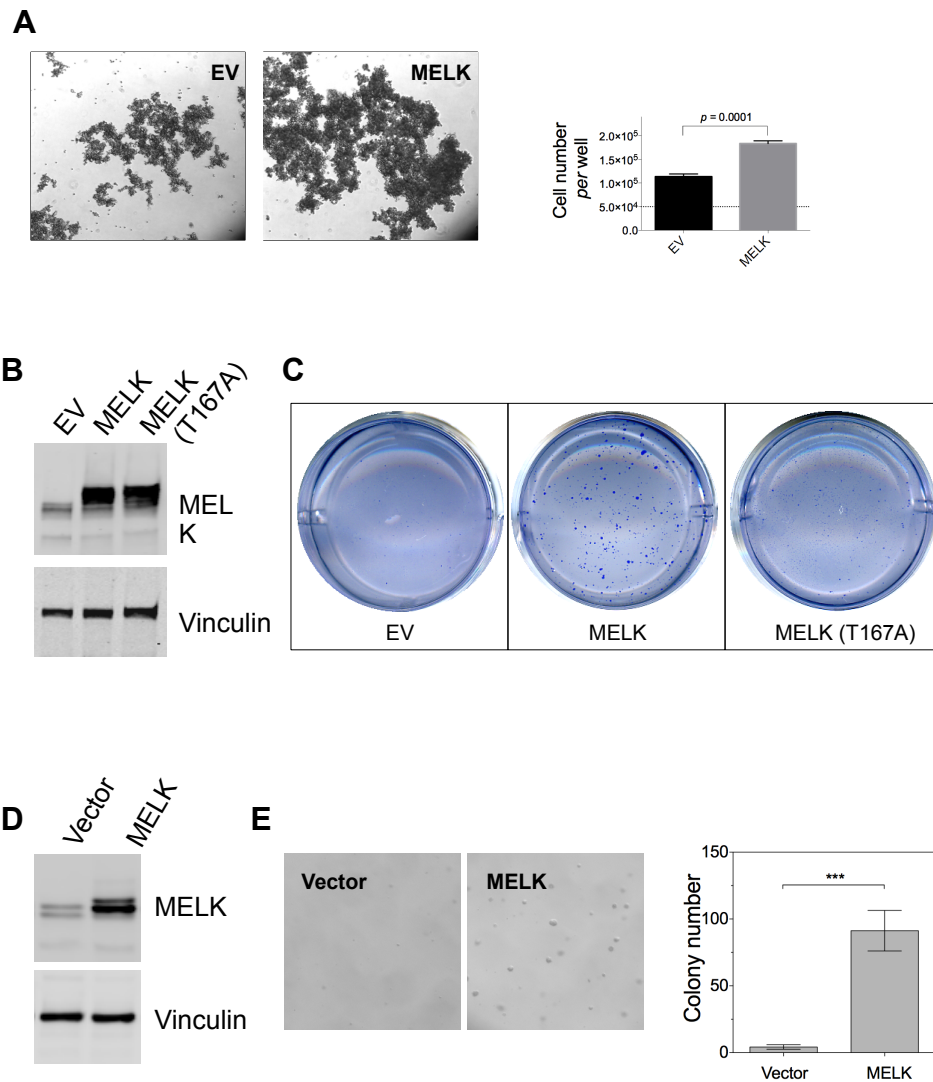

Supplement: supp [file elife-01763-supp-v1.zip › elife_poa_e01763_Figure_4_figure_supplement_2.pdf]

Figure 6-figure supplement 1

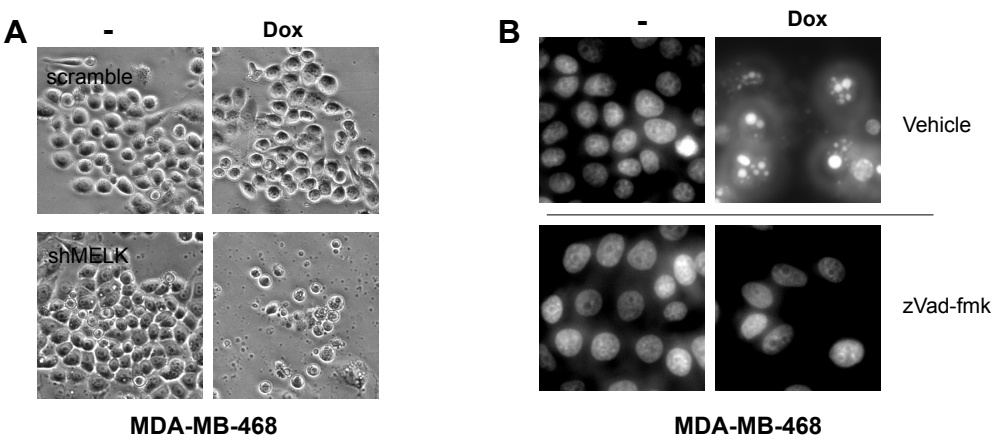

Supplement: supp [file elife-01763-supp-v1.zip › elife_poa_e01763_Figure_6_figure_supplement_1.pdf]

Figure 3-figure supplement 1

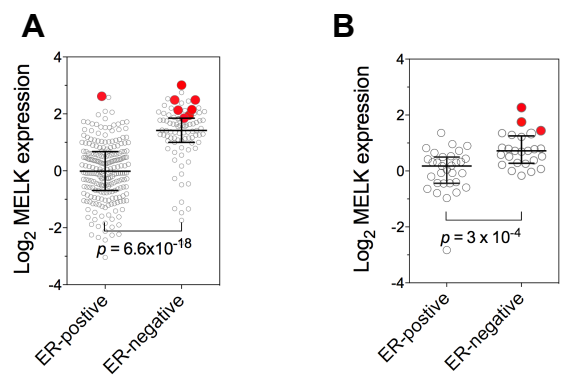

Supplement: supp [file elife-01763-supp-v1.zip › elife_poa_e01763_Figure_3_figure_supplement_1.pdf]

Figure 2-figure supplement 1

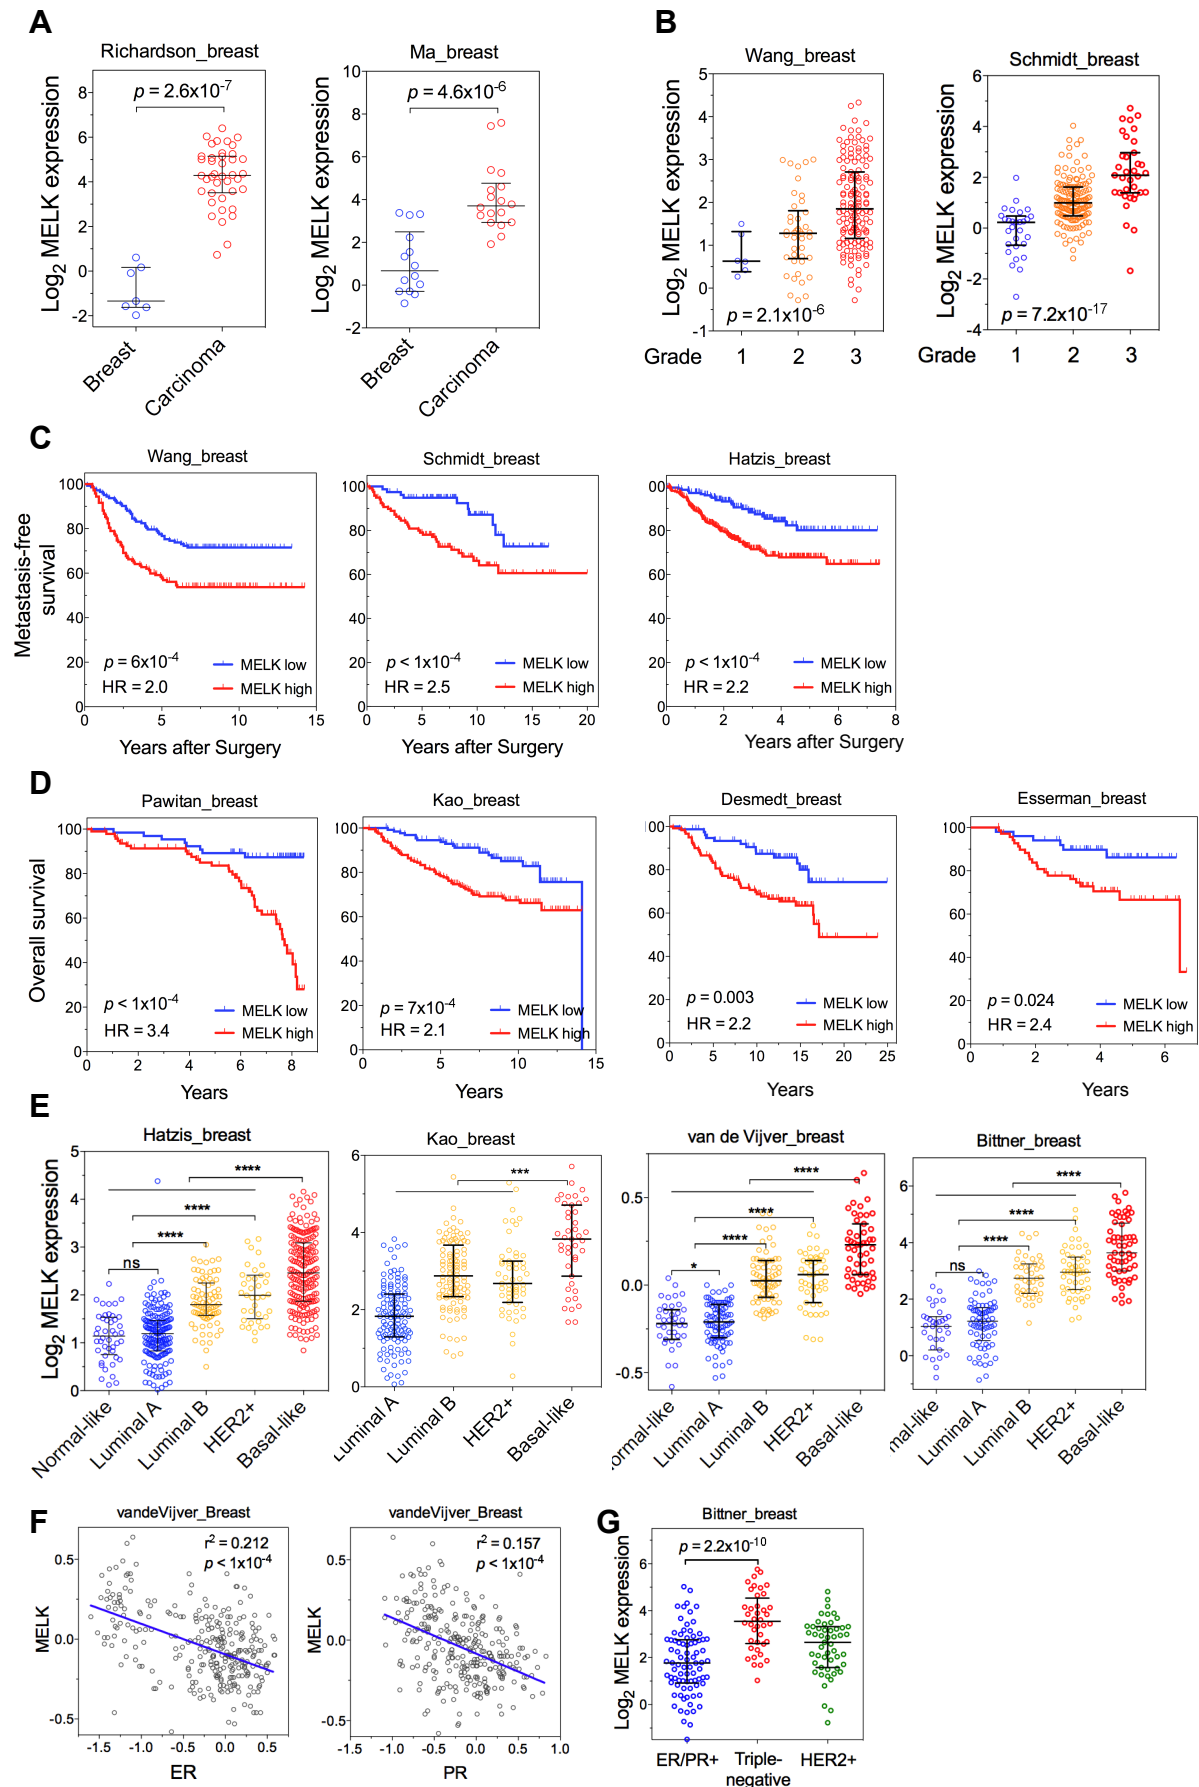

Supplement: supp [file elife-01763-supp-v1.zip › elife_poa_e01763_Figure_2_figure_supplement_1.pdf]

Figure 7-figure supplement 1

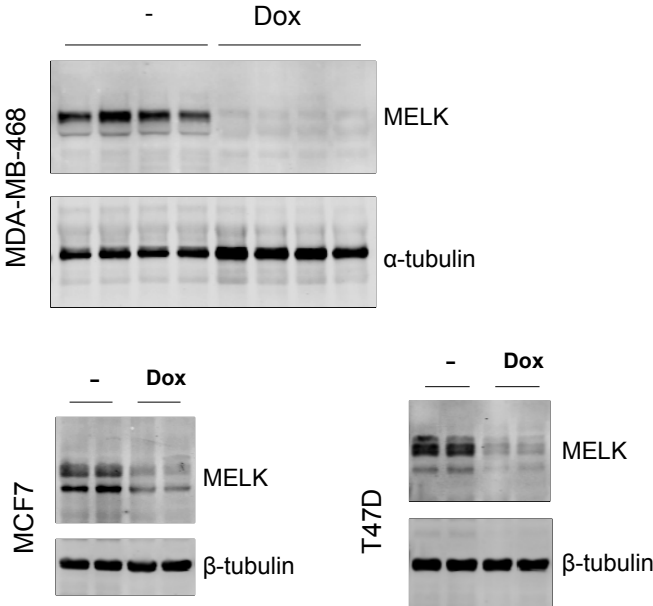

Supplement: supp [file elife-01763-supp-v1.zip › elife_poa_e01763_Figure_7_figure_supplement_1.pdf]
